# Novel Missing Data Imputation Approaches Enhance Quantitative Trait Loci Discovery in Multi-Omics Analysis

Zining Qi<sup>1,2</sup>, Alexandre Pelletier<sup>3</sup>, Jason Willwerscheid<sup>4</sup>, Xuewei Cao<sup>1</sup>, Xiao Wen<sup>5</sup>, Carlos Cruchaga<sup>6,7,8</sup>, Philip De Jager<sup>9,10</sup>, Julia TCW<sup>3,\*</sup>, and Gao Wang<sup>1,11,\*</sup>

<sup>1</sup>Center for Statistical Genetics, The Gertrude H. Sergievsky Center, Columbia University, New York, NY, USA

<sup>2</sup>Department of Biostatistics, Columbia University, New York, NY, USA

<sup>3</sup>Department of Pharmacology, Physiology & Biophysics, Chobanian & Avedisian School of Medicine, Boston University, MA, USA

<sup>4</sup>Department of Mathematics & Computer Science, Providence College, Providence, Rhode Island, USA

<sup>5</sup>Data Science Institute, Columbia University, New York, NY, USA

<sup>6</sup>Department of Psychiatry, Washington University School of Medicine, St. Louis, MO, USA

<sup>7</sup>NeuroGenomics and Informatics Center, Washington University School of Medicine, St. Louis, MO, USA

<sup>8</sup>Charles F. and Joanne Knight Alzheimer Disease Research Center, Washington University School of Medicine, St. Louis, MO, USA

<sup>9</sup>Department of Neurology, Center for Translational & Computational Neuroimmunology, Columbia University Medical Center, New York, NY, USA

<sup>10</sup>Cell Circuits Program, Broad Institute, Cambridge, MA, USA

<sup>11</sup>Department of Neurology, Columbia University, New York, NY, USA

\*Correspondence: Julia TCW, [juliatcw@bu.edu](mailto:juliatcw@bu.edu); Gao Wang, [wang.gao@columbia.edu](mailto:wang.gao@columbia.edu)

## 1 Abstract

Handling missing values in multi-omics datasets is essential for a broad range of analyses. While several benchmarks for multi-omics data imputation methods have recommended certain approaches for practical applications, these recommendations are not widely adopted in real-world data analyses. Consequently, the practical reliability of these methods remains unclear. Furthermore, no existing benchmark has assessed the impact of missing data and imputation on molecular quantitative trait loci (xQTL) discoveries. To establish the best practice for xQTL analysis amidst missing values in multi-omics data, we have thoroughly benchmarked 16 imputation methods. This includes methods previously recommended and in use in the field, as well as two new approaches we developed by extending existing methods. Our analysis indicates that no established method consistently excels across all benchmarks; some can even result in significant false positives in xQTL analysis. However, our extension to a recent Bayesian matrix factorization method, *FLASH*, exhibits superior performance in multi-omics data imputation across various scenarios. Notably, it is both powerful and well-calibrated for xQTL discovery compared to all the other methods. To support researchers in practically implementing our approach, we have integrated our extension to *FLASH* into the R package *flashier*, accessible at <https://github.com/willwerscheid/flashier>. Additionally, we provide a bioinformatics pipeline that implements *FLASH* and other methods compatible with xQTL discovery workflows based on *tensorQTL*, available at [https://cumc.github.io/xqtl-pipeline/code/data\\_preprocessing/phenotype/phenotype\\_imputation.html](https://cumc.github.io/xqtl-pipeline/code/data_preprocessing/phenotype/phenotype_imputation.html).

## 1. Introduction

Technological advancements in recent years have greatly enhanced the availability of high-throughput biological tools for researchers at reduced cost. This has led to a dramatic increase in the rate of data generation particularly in the area of multi-omics data science, where multiple types of molecular phenotypes (or traits) are generated from the same set of samples. Each type of multi-omics data, such as methylation, proteomics, and metabolomics, offers unique insights into different layers of biological processes. Methylation studies, for example, sheds lights into the epigenetic aspects affecting gene

27 activity. Proteomics focuses on the variety and levels of proteins that emerge from the process of gene  
28 expression. Furthermore, metabolomics analyses metabolites as products of synergistic interactions  
29 among multiple genes, to provide a broader perspective on metabolic pathways relevant to complex  
30 traits and disease phenotypes<sup>[1]</sup>.

31 Multi-omics phenotypes are now routinely measured in diverse biological samples, spanning various  
32 cell types and tissues. These measurements, obtained through different platforms, often contain varying  
33 levels of missing data. Such gaps in multi-omics data can occur for multiple reasons: poor sample  
34 quality, limited sample size to observe low phenotypic values, technical limitations of measurement  
35 platforms, and other reasons for sample drop-out in quality control. Depending on data-type, missing  
36 values in multi-omics studies can range from 5% to as high as 80%, according to our literature review  
37 detailed in Table S1. Consequently, it warrants thorough investigation how missing data is addressed  
38 in multi-omics research. This is particularly crucial given unique nature of each different multi-omics  
39 studies that leads to varying degrees and patterns of missing data.

40 Imputation is a widely accepted strategy for tackling missing data issues, facilitating statistical  
41 analyses on complete datasets without excluding samples or features that many statistical methods,  
42 not tailored for missing data, cannot handle. Several approaches have been documented in the existing  
43 multi-omics literature for missing value imputation<sup>[2]</sup>. Simple methods like mean imputation replace  
44 missing values with the average of observed data, whereas the lowest of detection (LOD) method uses  
45 the smallest observed value for filling in missing entries. Mean imputation and its more sophisticated  
46 derivatives — such as the K Nearest Neighbors (KNN) that leverages closest observed samples —  
47 are extensively utilized in various multi-omics studies<sup>[3,4]</sup>. Advanced methods — including low-rank  
48 approximation via matrix factorization<sup>[5-7]</sup> along with sophisticated regression methods that combine  
49 single or multiple imputation (SI/MI) with machine learning strategies<sup>[8]</sup> — have shown better perfor-  
50 mance than KNN in simulation benchmark studies<sup>[9]</sup>, yet they are not as commonly adopted as KNN  
51 or other simpler methods in practice. For a comprehensive list of multi-omics imputation method  
52 benchmarks and the recommended approaches derived from these benchmarks, please refer to Table  
53 S2.

54 We have identified several gaps between methodological work in the literature and their practical  
55 applications to multi-omics data. Firstly, as indicated in Tables S1 and S2, it is evident that real-world  
56 multi-omics studies (even high-impact ones) frequently opt for simpler imputation techniques over  
57 more advanced methods<sup>[10,11]</sup>. This trend raises questions about the practical reliability of advanced  
58 methods in various multi-omics research contexts, such as clustering, differential expression analysis,  
59 and molecular quantitative trait loci (xQTL) discoveries. Secondly, most existing benchmarks focus  
60 narrowly on specific types of multi-omics data. There are only a few that comprehensively address a  
61 broad spectrum of data types with varying sample sizes, extents, and patterns of missing data<sup>[12-14]</sup>.  
62 Furthermore, these benchmarks often rely on synthetic data such as simulations based on real data to  
63 assess methods performance, leaving uncertainties about how these findings translate to reliability and  
64 robustness in real-world studies. Lastly, to our knowledge there is not yet a benchmark specifically  
65 tailored for xQTL analysis. This gap became apparent in our search for methodological guidance to  
66 impute multi-omics data for xQTL analysis, posing challenges in making informed decisions for several  
67 of our ongoing research projects.

68 Driven by the practical need to tackle missing data issues in xQTL analysis, we conducted an exten-  
69 sive evaluation of 16 methods as detailed in Table S3. Promising results from some existing methods in  
70 our preliminary benchmarks motivated us to develop new enhancements using similar models and al-  
71 gorithms. We utilized data across three cohorts/biobanks, focusing on three types of multi-omics data  
72 known for wide-spread missing values (methylation, proteomics, and metabolomics). Our approach  
73 involves conducting simulation studies to assess imputation accuracy, xQTL discovery power and cal-  
74 ibration, along with real-world xQTL discovery and subsequent replication studies. We show that our  
75 extension to a recent empirical Bayes matrix factorization approach, *FLASH*, outperforms other meth-  
76 ods in almost every scenario we examined, is reasonably fast for large-scale multi-omics datasets, and  
77 producing outputs that are more straightforward to interpret compared to various machine learning  
78 approaches.

## 79 2. Results

### 80 2.1. Overview of multi-omics imputation and xQTL discovery benchmark design

81 We developed a comprehensive benchmark for simulation and real data analysis to evaluate methods  
 82 across three multi-omics modalities — proteomics, metabolomics, and DNA methylation — in three  
 83 multi-omics resources including the Religious Orders Study/Memory and Aging Project (ROSMAP),  
 84 Knight Alzheimer Disease Research Center (Knight), and Mount Sinai Brain Bank (MSBB). These  
 85 datasets underwent standard quality control (QC) and normalization, as previously detailed for these  
 86 specific datasets<sup>[15–17]</sup>. By offering a diverse range of sample sizes, molecular features, measurement  
 87 platforms, and missing data patterns, these datasets enables us to create an extensive framework for  
 88 missing data methods assessment (Details see Section 4).

89 As illustrated in Figure 1, the multi-omics imputation and QTL analysis benchmark in our study  
 90 consists of several key steps. We began by simulating missing data patterns completely at random  
 91 (MCAR) across various rates, from a minimal 5% to an extreme 50%, reflecting both literature reports  
 92 (Table S1) and the characteristics of our own data-sets (Figure S1). To more accurately approximate  
 93 real-world multi-omics data with realistic missing patterns, we developed a descriptive model based  
 94 on data from ROSMAP, Knight, and MSBB to generate missing values not at random (MNAR) for  
 95 the three modalities assessed (Section 4.2.1). Beyond benchmarking imputation accuracy, we further  
 96 conducted numerical studies for xQTL discovery. This involved simulating genotypic associations  
 97 (xQTL) with realistic molecular phenotypes, and applying statistical fine-mapping to determine the  
 98 impact of imputation methods on identifying true non-zero genotypic effects. We then applied these  
 99 methods to discover xQTL in our datasets, focusing on pQTL and metaQTL, and compared significant  
 100 genes identified by each method. To validate the robustness of our findings, we carried out replication  
 101 studies for pQTL discovery among the three resources.

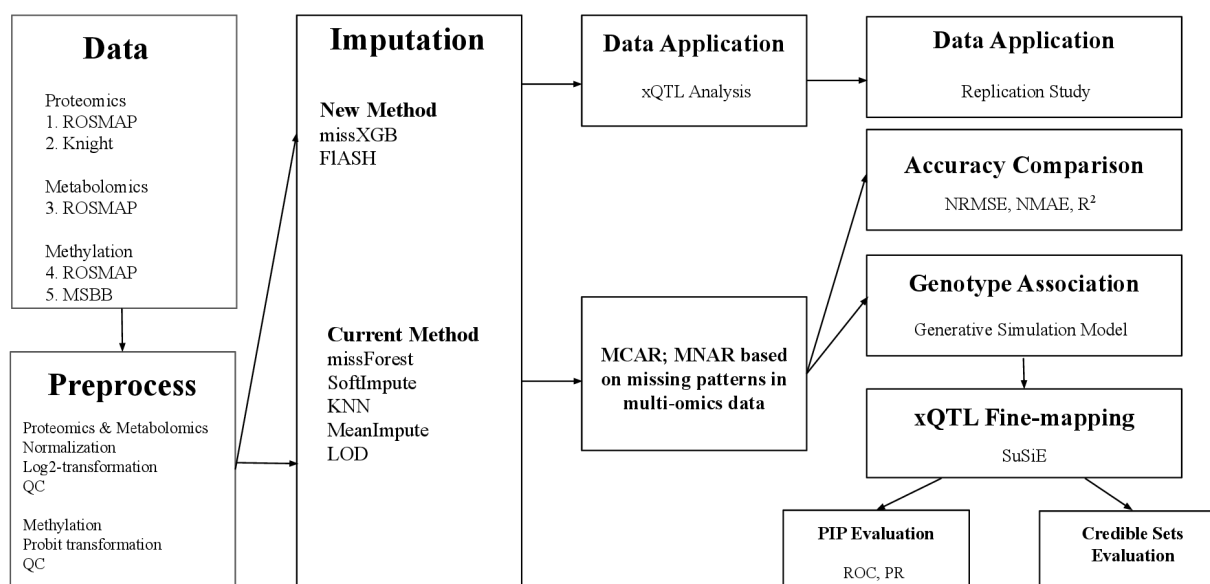

**Fig. 1. Overview of multi-omics imputation methods and xQTL discovery benchmark.** This workflow summarize the datasets, imputation methods and key steps of evaluating imputation methods in the context of xQTL studies, using both simulated and real-world multi-omics data.

102 We assessed imputation accuracy, xQTL detection power, false discovery rate control, real-world  
 103 xQTL discovery, replication, and runtime across 16 methods (Table S3). This selection represents major  
 104 imputation techniques in the multi-omics field (Table S1 and S2), covering: 1) observed value based  
 105 methods such as *MeanImpute*, *LOD*, *KNN*; 2) low-rank approximation methods such as *SoftImpute*<sup>[5]</sup>

106 and *FLASH*<sup>[18]</sup>; and 3) machine learning regression approaches incorporated to single or multiple  
107 imputation frameworks<sup>[19,20]</sup> such as *MissForest*<sup>[8]</sup>, and LR<sup>[21]</sup>.

108 We also introduce two new methods by extending existing ones. The first, *MissXGB*, is an adap-  
109 tation of *MissForest*, using XGBoost<sup>[22]</sup> for machine learning regression instead of traditional random  
110 forest regression trees. The second, and optimized version of *FLASH*, enhances computational ef-  
111 ficiency and imputation accuracy through a genome-wide *FLASH* approach that explicitly models  
112 chromosome-specific and global factors. Further details about *MissXGB* and the modified *FLASH* are  
113 provided in Section 4.1.

114 After exploring various parameter settings for the methods under consideration, such as the num-  
115 ber of neighbors ( $K$ ) in KNN, the regularization and threshold parameters in *SoftImpute*, and the  
116 choice of priors in *FLASH*, we finalized a selection of seven methods for comprehensive benchmarking  
117 as described earlier. These methods are summarized with their respective abbreviations in the box  
118 “Imputation” on Figure 1. Key findings from our simulation studies are summarized in Figures 2, 3,  
119 4, with additional details in Table S4. Real-world data analysis results are summarized in Figure 5  
120 and Table 1, with additional details in Figures S1 and S2.

## 121 2.2. *FLASH outperforms other methods in imputation accuracy for multi-omics data*

122 We gauged the efficacy of various imputation methods using metrics such as NRMSE, NMAE, and  $R^2$ ,  
123 the definitions of which are provided in Section 4.2.2. Our evaluation focused on individual molecular  
124 features, including protein levels for specific genes, metabolite measurements, and CpG site intensities.  
125 Aggregated performance across multiple molecular features are shown as box plots (Figure 2 and 3).  
126 For each dataset we evaluated a range of missing rates of MCAR scenarios, along with dataset-specific  
127 MNAR patterns. Interestingly, we observed that the pattern of missing data was less influential than  
128 the sample size and the number of features. Therefore, in our analysis, we present MCAR scenarios at  
129 50% as an example of a moderate to high level of missing data, a situation frequently encountered in  
130 real-world settings (Table S1, Figures S1 and S2).

131 We found that widely used observation based methods like KNN (demonstrated here as  $KNN_{10}$   
132 with  $K = 10$ ) and *MeanImpute* consistently underperform across various scenarios, especially when  
133 compared to low-rank approximation and machine learning regression techniques. The new imputation  
134 tool we developed, *MissXGB*, showed comparable or slightly superior performance to *MissForest*. We  
135 also noted that *SoftImpute* is effective for larger datasets (in terms of samples and features) compared  
136 to *MissForest* and *MissXGB*. However, its performance suffers in datasets with fewer samples and  
137 features, such as Knight proteomics and ROSMAP metabolomics, though it still surpasses  $KNN_{10}$  and  
138 *MeanImpute*. Our enhanced *FLASH* method proved capable of efficiently handling both large and  
139 small multi-omics datasets, consistently outperforming other methods in all evaluated scenarios.

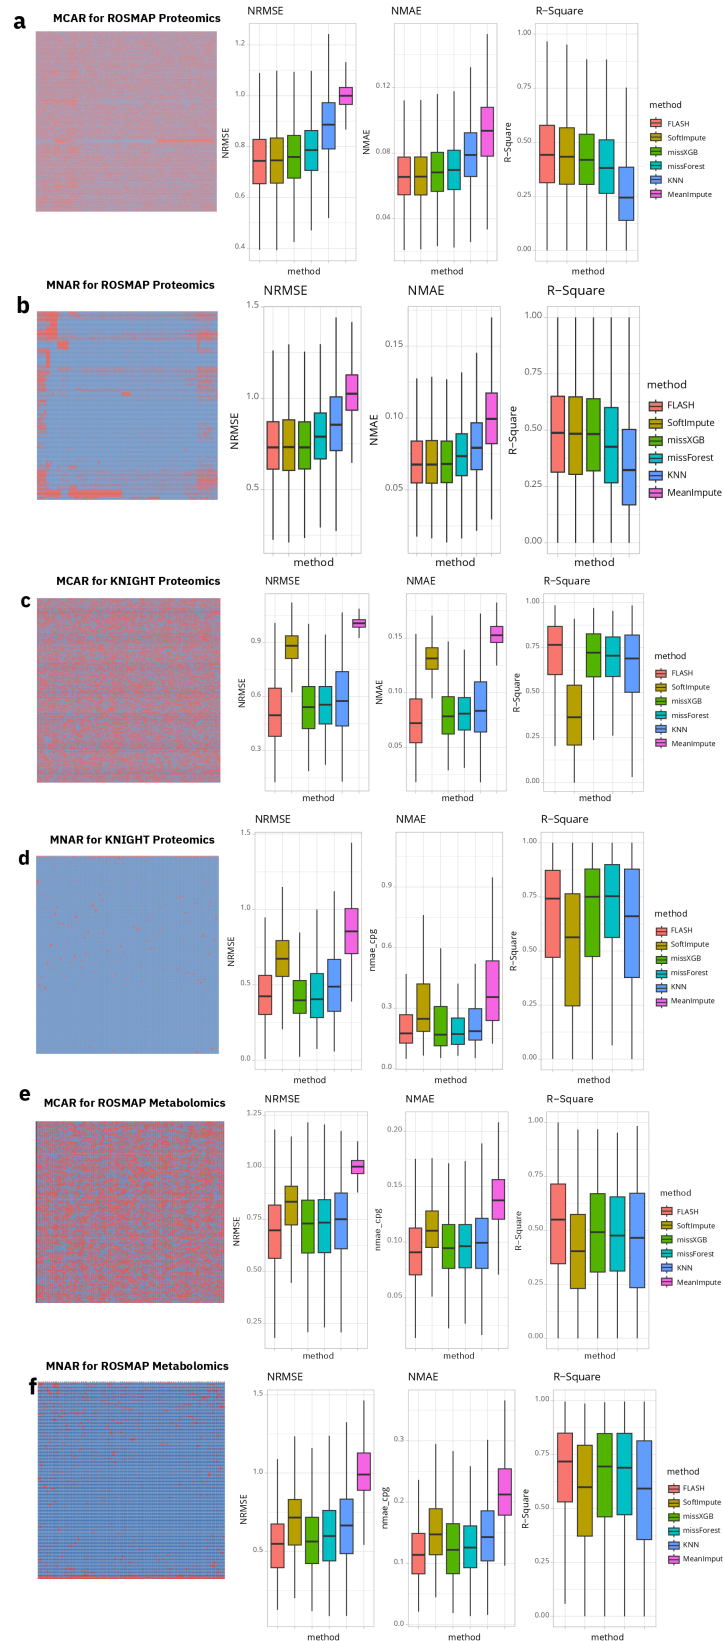

**Fig. 2. Imputation accuracy for Proteomics and Metabolomics data.** Panel a-f summarize the performance of methods on imputation accuracy for proteomics and metabolomics data. Missing patterns are displayed for different scenario and datasets, followed by boxplots showing feature-wise accuracy using 3 metrics. Panel a, c, e illustrate ROSMAP proteomics, Knight proteomics, and ROSMAP metabolomics data with MCAR. Panel b, d, f illustrate ROSMAP proteomics, Knight proteomics, and ROSMAP metabolomics data with MNAR.

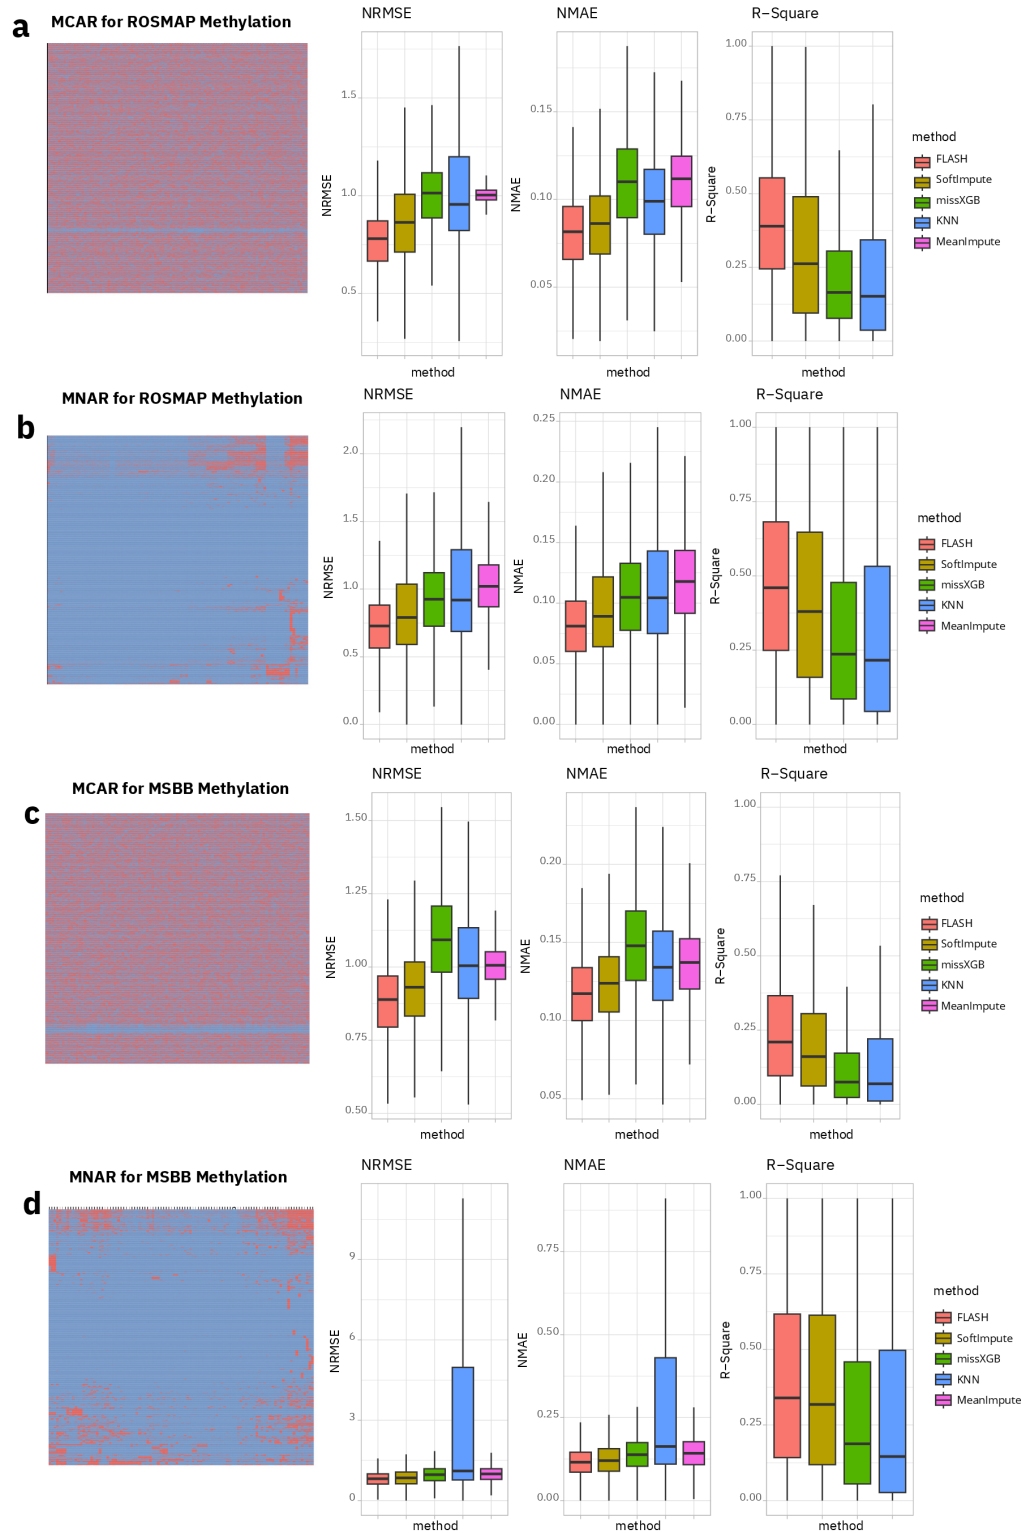

**Fig. 3. Imputation accuracy for Methylation data.** Similar to Figure 2, panel a and c illustrates ROSMAP methylation and MSBB methylation with MCAR. Panel b and d illustrate ROSMAP methylation, MSBB methylation with MNAR.

### 140 2.3. *FLASH demonstrates increased power and improved false discovery control in xQTL studies*

141 After conducting fine-mapping on simulated xQTL data, as explained in Section 4.3, we assessed power  
142 and false discovery rates using precision-recall and ROC curves at various posterior inclusion probability  
143 thresholds. This was done under the challenging conditions of 50% MCAR settings, reflecting moderate  
144 to high missing rates commonly seen in practice. Consistent with our predictions, the effectiveness of  
145 imputation methods in xQTL discovery power aligns with our earlier evaluation of their imputation  
146 performance. For moderately sized multi-omics data, *FLASH* outperforms other methods, closely  
147 followed by *SoftImpute*. Both *MissForest* and *MissXGB* show similar results and are notably more  
148 effective than *KNN*<sub>10</sub>, *MeanImpute*, and *LOD* (Figures 4, panel a, d, e). Performance of *SoftImpute*  
149 declines in smaller data-sets (Figures 4, panel b, c). We noticed that in simulations of Knight-based  
150 pQTL studies with small sample and feature sizes, *KNN*<sub>10</sub> outperforms *MissXGB* in terms of power.

151 We also evaluated the calibration of fine-mapping credible sets (CS) by their coverage, defined as  
152 the proportion of CS capturing the true simulated effects. For well-calibrated 95% CS, the coverage  
153 is expected to be at least 95%. Our findings indicate that not all imputation methods lead to well-  
154 calibrated CS. As shown in Figure 4, panel a-c, *LOD* and *MeanImpute* have inadequate false discovery rate  
155 (FDR) control. *SoftImpute* also fails to control FDR in smaller datasets. Even *KNN*<sub>10</sub> and  
156 *MissXGB* exhibit slightly inflated 95% CS under certain conditions. Reassuringly, both *FLASH* and  
157 *MissForest* demonstrate well-controlled FDR. Moreover, compared to *MissForest*, 95% CS from *FLASH*  
158 attain higher observed coverage.

159 The outcomes of our numerical xQTL studies highlight that *FLASH*-based imputation of molec-  
160 ular phenotype measurements is the most powerful for xQTL discovery, while also being the most  
161 conservative in terms of FDR.

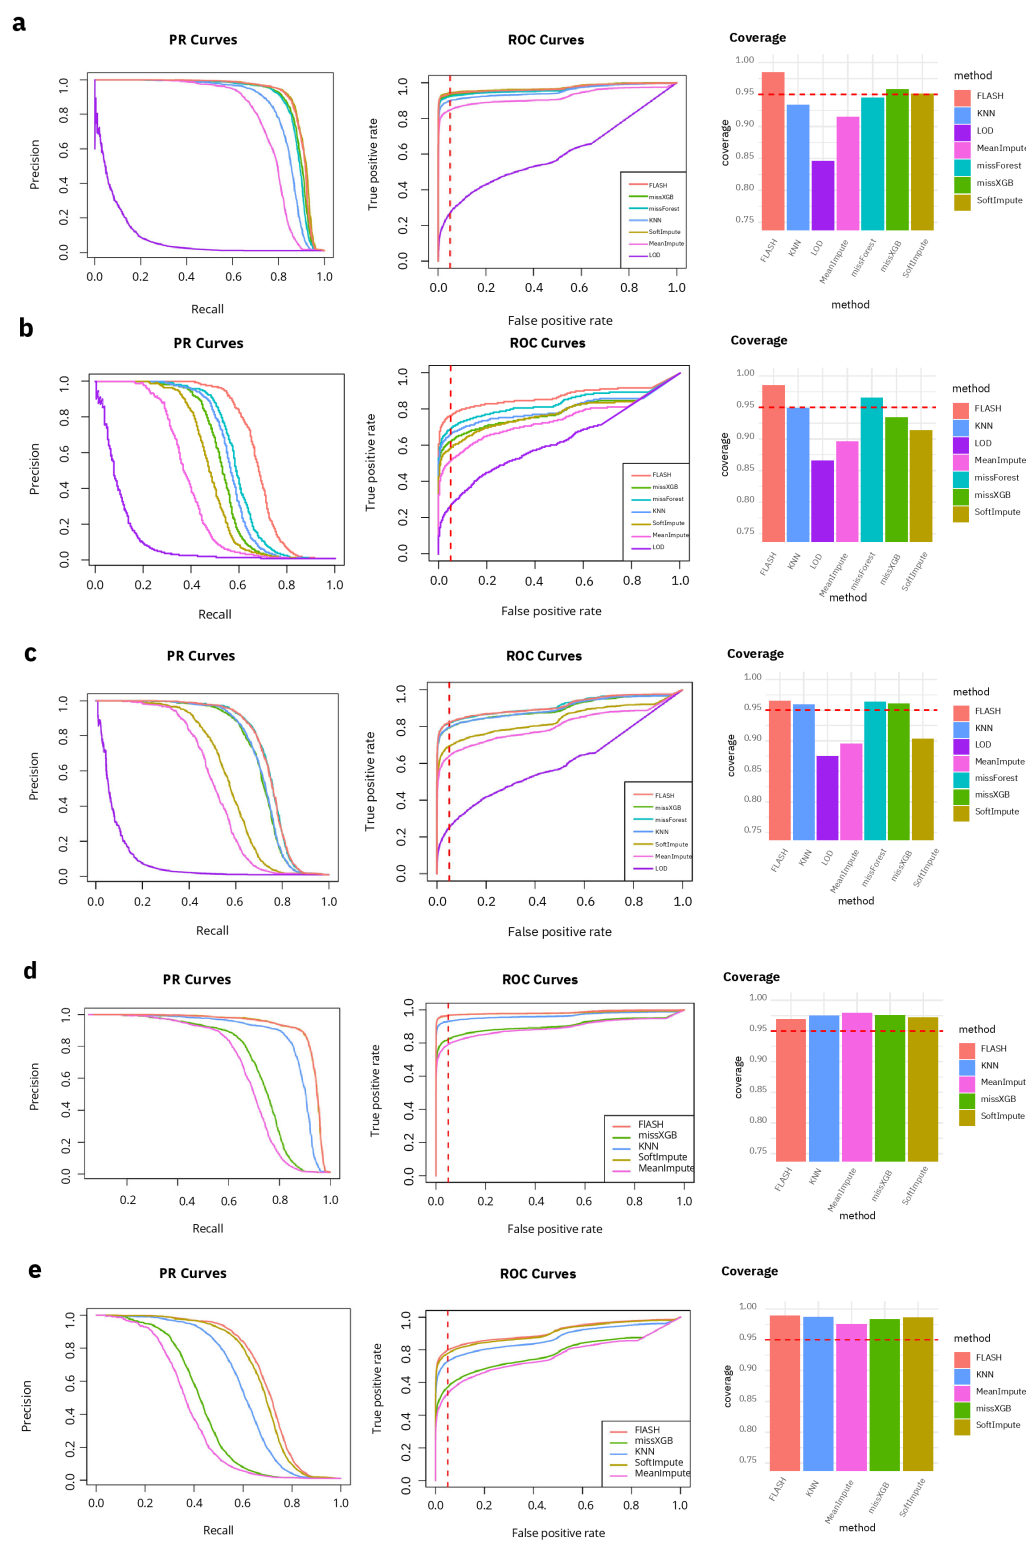

**Fig. 4. Impact of imputation methods on xQTL discoveries.** Fine-mapping posterior inclusion probability and credible sets (CS) comparison of imputation methods are summarized as PR/ROC curves and bar plots. Panel a is results for ROSMAP Proteomics. The PR and ROC curves are calculated based on PIP result from SuSiE<sup>[23]</sup>. The red dashed line on ROC curves are false positive rate at 0.05. Coverage can be interpreted as  $1 - FDR$ ; the red dashed line on the coverage plots is 0.95 corresponding to FDR at 0.05 for fine-mapping CS. Panel b, c, d, e summarize the performance for Knight proteomics, ROSMAP metabolomics, ROSMAP methylation, and MSBB methylation respectively.



## 2.4. FLASH yields additional and robust xQTL discoveries in real-world multi-omics data analysis

### 2.4.1. Statistical analysis for xQTL association

We applied seven imputation methods to proteomics data from ROSMAP (totaling 7,712 genes) and Knight (1,181 genes), along with metabolomics data from ROSMAP (635 metabolites). These datasets were then processed using the FunGen-xQTL analysis protocol described in Section 4.4. Following standard xQTL study practices, we present a gene-level summary of pQTL discovery. This involves permutation testing for each gene within the cis-window to adjust for multiple testing of many genetic variants<sup>[24,25]</sup>, and genome-wide false discovery rate control at gene level using the qvalue method<sup>[26]</sup>. For the metabolomics data, we conducted a GWAS for each metabolite, counting significant metaQTLs as those with p-values below the standard GWAS threshold of  $5 \times 10^{-8}$ , without additional adjustments for multiple testing at metabolites level. xQTL discoveries are summarized in Table 1. We selected *KNN*<sub>10</sub> as a baseline for comparison due to its popularity in multi-omics literature, and relatively calibrated results across evaluated scenarios as shown in Figure 4.

In the ROSMAP proteomics data, *FLASH* led to the identification of the most pGenes (genes with at least one pQTL), closely followed by *SoftImpute*, *MissXGB*, and *MissForest*. While *MeanImpute* and *LOD* detected more pGenes than *KNN*<sub>10</sub>, these results warrant caution given their potential for inflated false discoveries as previously demonstrated. In the smaller Knight dataset, *FLASH* proved to be the most conservative, yielding the fewest pGenes. Conversely, *SoftImpute*, which has shown a propensity for false positives, identified nearly double the pGenes compared to *FLASH*, while *MeanImpute* found over three times more. The most striking result was from *LOD*, reporting 1,056 pGenes — 91.7% of all genes in the Knight proteomics dataset — which likely includes many false positives.

**Table 1. Analysis of pQTL data: discovery from ROSMAP.** The first column summarizes the number of pQTL genes identified by each method and their proportion compared to the total gene counts in ROSMAP. The second column compares each method to *KNN*<sub>10</sub>, showing the percentage increase or decrease in the number of significant genes identified. The last column summarizes genes uniquely identified by each method.

| Method                   | ROSMAP          |                                     |                 |
|--------------------------|-----------------|-------------------------------------|-----------------|
|                          | #(%) sig. genes | diff. from <i>KNN</i> <sub>10</sub> | method specific |
| <i>FLASH</i>             | 2,811(37.8%)    | 18.8%                               | 930             |
| <i>MissXGB</i>           | 2,640(35.5%)    | 11.58%                              | 759             |
| <i>MissForest</i>        | 2,625(35.3%)    | 10.95%                              | 744             |
| <i>KNN</i> <sub>10</sub> | 2,336(31.4%)    | 0.0%                                | 455             |
| <i>SoftImpute</i>        | 2,654(35.7%)    | 12.17%                              | 773             |
| <i>MeanImpute</i>        | 2,585(34.8%)    | 9.27%                               | 704             |
| <i>LOD</i>               | 2,527(34.0%)    | 6.80%                               | 646             |

### 2.4.2. Replication analysis for pQTL results between Knight and ROSMAP

In the context of real-world xQTL discoveries, the absence of known ground truth poses a challenge in validating the robustness different imputation methods for the xQTL signals obtained through them. To address this, we conduct replication analyses between Knight and ROSMAP data-sets. Specifically, we designated the pQTL data from the smaller Knight proteomics sample as the discovery set and the pQTL from the larger ROSMAP sample as the replication set. We incorporated cross-method results when defining these sets, aiming to create both reasonable discovery and robust replication data. The criteria for these sets were established as follows:

- Method-specific discovery set: for genes that exist in both ROSMAP and Knight, we evaluate significant genes (permutation q-value < 0.05) in Knight pQTL reported by each of the 7 methods, which gives us 7 discovery sets.
- Baseline discovery set: for genes that exist in both ROSMAP and Knight, we consider those reported significant (permutation q-value < 0.05) in Knight pQTL by 6 methods excluding *LOD*. This gives us 76 genes.
- Joint discovery set: for genes that exist in both ROSMAP and Knight, we consider those reported significant (permutation q-value < 0.05) in Knight pQTL by any of those methods that shows well

199 calibrated coverage in simulation studies, including *FLASH*, *MissForest*, *MissXGB* and *KNN*<sub>10</sub>.  
 200 This is a total of 78 genes.

- 201 • Replication set: for genes that exist in both ROSMAP and Knight, we consider those reported  
 202 significant (permutation q-value < 0.05) in ROSMAP pQTL by 6 methods excluding *LOD*. This  
 203 is a total of 171 genes.
- 204 • We compute replicate rate as  $\frac{\# \text{genes in both discovery and replication sets}}{\# \text{genes in discovery set}}$ . This gives us baseline repli-  
 205 cation rate of 57.9% and joint replication rate of 56.4%.
- 206 • We define relative replication rate as method specific replication rates divided by the joint repli-  
 207 cation rate.

208 Method-specific replication rates are shown in Figure 5. In these comparisons, *FLASH* continues  
 209 to outperform, demonstrating the highest replication rates among the methods evaluated.

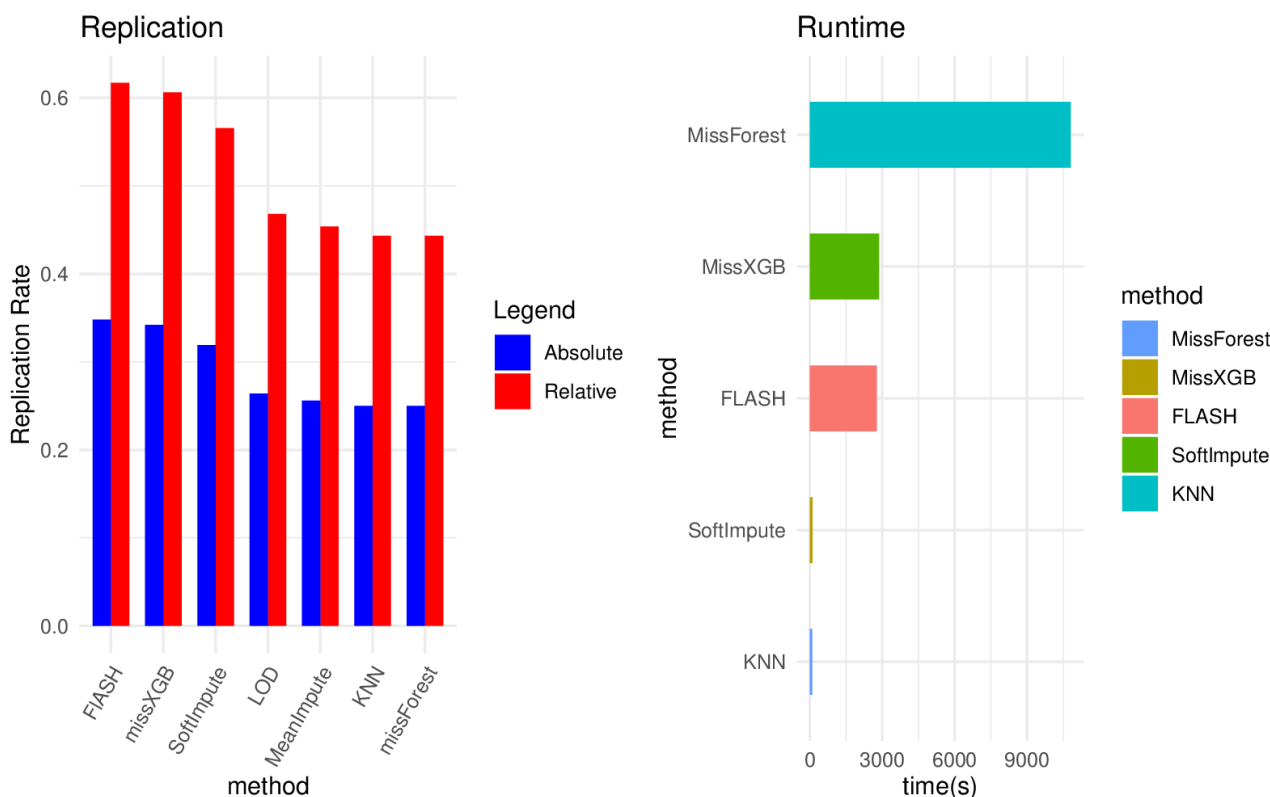

**Fig. 5. Analysis of pQTL data: replication and runtime.** Panel a summarizes the absolute and relative replication rate for each method in the pQTL replication study, comparing discoveries in Knight to those in ROSMAP. The relative replication rate is calculated by absolute replication over replication of joint discovery set. Panel a shows the runtime of each method for imputation on ROSMAP proteomics data.

210 Runtime benchmarks for all imputation methods were conducted using the ROSMAP proteomics  
 211 data. Our findings indicate that while *FLASH* and *MissXGB* take longer to process than simpler  
 212 methods like *MeanImpute*, *LOD*, and *KNN*<sub>10</sub>, they are still significantly faster than *MissForest*, and  
 213 are practical for analyzing real-world datasets.

### 214 3. Discussion

215 Missing data in multi-omics studies is a common issue that poses practical challenges. Various algo-  
 216 rithms, statistical models, and machine learning methods are theoretically available to impute miss-  
 217 ing multi-omics data, but beyond simulation studies for imputation accuracy, the impact of missing

218 data and the choice of methods in specific contexts, such as molecular xQTL analysis, is not well-  
219 understood. This work demonstrates, through both simulation and data applications, the significant  
220 impact of missing data handling on xQTL discoveries. We recommend a Bayesian matrix factorization  
221 approach, *FLASH*, as a default choice for imputing missing data in certain types of multi-omics studies  
222 including proteomics, metabolomics and methylation.

223 In our in-depth comparison of the selected seven imputation methods, we evaluated performance  
224 across three multi-omics data types with varying sample sizes, number of features, and missing patterns  
225 (MAR and MNAR). Our findings align with previously published benchmark on methylation data,  
226 which advised against using KNN for imputation and suggested regression-based imputation as a  
227 powerful strategy<sup>[27]</sup>. The pattern of missingness appears less critical than the nature of the data  
228 (types and size of multi-omics data). For xQTL studies, we found that the performance in power is  
229 consistent with accuracy. However, methods like *MeanImpute*, *LOD*, and sometimes *KNN*<sub>10</sub>, showed  
230 inflated type I errors, potentially leading to spurious xQTL signals in practice. In real data analysis,  
231 we examined xQTL in multi-omics data from three sources, finding that the choice of imputation  
232 method can lead to different genes being identified. In all scenarios and datasets, *FLASH* consistently  
233 outperformed other methods in imputation accuracy, power for xQTL discovery, calibration of FDR  
234 control, and attained the highest xQTL discovery replication rate. Notably, inferences drawn from  
235 *FLASH* were more interpretable than those from other methods, shedding lights into the inherent  
236 hidden structures in high-dimensional multi-omics datasets.

237 The development of new approaches — *MissXGB* and an extension to *FLASH*— was motivated  
238 by the need to efficiently analyze large-scale datasets in light of initial promising results from the  
239 benchmark. Both *MissForest* and *FLASH*, while more accurate compared to other methods, are slow  
240 for large datasets. For example, for the ROSMAP methylation dataset with 721 individuals and 450K  
241 CpGs, it takes 7 days for *MissForest* and 2 days for *FLASH* implemented in R package *flashier*)  
242 to complete the analysis. Our new *MissXGB* approach and extension to *FLASH* are much faster  
243 while maintaining comparable accuracy. In particular, *FLASH*, as a novel method in the context of  
244 multi-omics data imputation, is highly recommended for practical applications.

245 Our work, while comprehensive, has several limitations that may require further investigation.  
246 Firstly, none of the methods or benchmarks we used take advantage of information across different  
247 multi-omics modalities, especially when data for the same set of individuals is available, as in the  
248 case of the ROSMAP and MSBB datasets in our study with RNA-seq, methylation and proteomics  
249 features measured. More sophisticated methods might offer improved results in such scenarios<sup>[13]</sup>,  
250 though we did not test their practical performance. Secondly, our analysis was confined to proteomics,  
251 metabolomics, and methylation data. We did not assess the impact of missing data and imputation  
252 methods on other xQTL data types, particularly single cell or single nucleotide RNA-seq, though there  
253 are existing benchmarks and recommendations for these data types<sup>[28]</sup>. Our framework for evaluating  
254 xQTL power and FDR could be adapted to these benchmarks to determine whether certain methods  
255 can improve xQTL discoveries. Thirdly, the imputation methods we employed are generic. There  
256 is potential for future development of methods tailored to specific data types, for example matrix  
257 factorization methods — possibly by extending *FLASH*— for functional data such as methylation. We  
258 did not explore domain-specific approaches, such as penalized functional regression, which might offer  
259 better results for methylation imputation<sup>[29]</sup>. Finally, while our benchmark design is sophisticated  
260 and includes both simulation and real-data applications, the methods we considered are limited to  
261 those that are popular and computationally feasible. In particular, we did not systematically evaluate  
262 deep learning approaches, which might be effective when executed properly<sup>[30,31]</sup>. In fact, we did  
263 implement and benchmark a variational auto-encoder approach<sup>[32]</sup>, but found its performance to be  
264 highly sensitive to parameter tuning and generally less satisfactory than simpler methods, leading us  
265 to exclude it from our in-depth comparison.

266 Implementation of our benchmark outlined in Figure 1 is available at <https://github.com/zq2209/omics-imputation-paper>. The R package *MissXGB* is available at <https://github.com/zq2209/missXGB>. Our extension to *FLASH* is available at <https://github.com/willwerscheid/flashier>. Imputation pipeline for real-world data analysis implementing seven methods can be found at [https://cumc.github.io/xqtl-pipeline/code/data\\_preprocessing/phenotype/phenotype\\_imputation.html](https://cumc.github.io/xqtl-pipeline/code/data_preprocessing/phenotype/phenotype_imputation.html).

## 272 4. Material and Methods

### 273 4.1. Multi-omics missing data imputation methods

274 In this manuscript, we focus on several key methods, including *MeanImpute*, *LOD*, *KNN<sub>10</sub>*, *SoftIm-*  
275 *pute*, and *MissForest*, each with different parameterizations as detailed in Table S3. Additionally, we  
276 introduce two new approaches, *MissXGB* and *FLASH*, detailed in the subsequent sections.

#### 277 4.1.1. The *MissXGB* algorithm

278 We developed the *MissXGB* algorithm and software package in R, which follows from the *MissForest*<sup>[8]</sup>  
279 framework but using an XGBoost model trained on the observed portions of a dataset to predict  
280 missing values. Specifically, a data matrix  $D_{n \times p}$  can be divided into four parts based on any given  $j$ -th  
281 variable  $D_j$  (a length- $n$  vector):  $Y_{obs}$ ,  $Y_{miss}$ ,  $X_{obs}$ , and  $X_{miss}$ . Here,  $Y_{obs}$  represents the observed values  
282 of  $D_j$ , while  $Y_{miss}$  denotes its unobserved values. Variables other than  $j$  in the dataset are partitioned  
283 into  $X_{obs}$  and  $X_{miss}$  for observed and missing values respectively. Overall, for each column  $X_{miss}$ , a  
284 XGBoost model is trained with response  $Y_{obs}$  and predictors  $X_{obs}$ . The trained model is then applied to  
285 predict  $Y_{miss}$  with  $X_{miss}$ . The iteration will stop as soon as the difference between the newly imputed  
286 data matrix and the previous one increases for the first time. Algorithm 1 outlines the *MissXGB*  
287 implementation.

---

#### Algorithm 1 *MissXGB* Algorithm

---

**Require:** The  $n \times p$  matrix  $D$ ; stopping criteria  $\delta_s$

**Ensure:**  $Y_{obs}$ ,  $Y_{miss}$ ,  $X_{obs}$ , and  $X_{miss}$

Sort columns of  $D$  w.r.t increasing amount of missing values

Initialized missing values by *MeanImpute*

**while** not  $\delta_s$  **do**

$X^{old}$ : the previous imputed dataset

**for**  $s$  in  $p$  **do**

        Train an XGBoost model:  $Y_{obs} \sim X_{obs}$

        Predict  $Y_{miss}$  using  $X_{miss}$

        Update  $X^{new}$  using  $Y_{miss}$

**end for**

    update  $\delta = \frac{\sum_n (X^{new} - X^{old})^2}{\sum_n (X^{new})^2}$

**end while**

---

#### 288 4.1.2. Extension to *FLASH*

289 *FLASH*— the Factors and Loadings by Adaptive SHrinkage — is an Empirical Bayes Matrix Factor-  
290 ization (EBMF) model that can be applied to perform low-rank approximation for high-dimensional  
291 data. We apply *FLASH* to identify hidden structures in datasets and use them to impute missing val-  
292 ues. Unlike standard matrix factorization methods like PCA or SVD, *FLASH* offers a more versatile  
293 Empirical Bayes approach. This flexibility allows the model to handle various levels of sparsity in the  
294 loadings ( $L$ ) and factors ( $F$ ). One advantages is its adaptive shrinkage feature, which automatically  
295 selects the number of factors for  $L$  and  $F$ , saving users from having to manually choose and adjust  
296 this parameter.

### 297 4.2. Numerical Study on imputation accuracy

#### 298 4.2.1. Simulating realistic missing patterns in multi-omics data

299 In our study, we assessed the performance of different methods using simulated datasets with missing  
300 values categorized as either completely at random (MCAR) or missing not at random (MNAR)<sup>[33–35]</sup>.  
301 The MNAR simulations were crafted to mirror missing patterns found in actual multi-omics data.  
302 We implemented a Bayesian approach to create these missing values, taking into account both the  
303 observed data and the identified missing patterns. By clustering samples and features based on their

304 missing profiles, we identified major patterns of missingness in data. The probability of occurrence of  
305 missing patterns was used as a prior. This, in conjunction with the observed probability of data being  
306 missing, enabled us calculate the probability of missingness taking into consideration of information  
307 both from other variables (common in missing at random, MAR, scenarios) and from the variable itself  
308 (a characteristic of MNAR situations).

309 To implement this, consider data matrix  $D$  with dimensions  $n \times p$ . This matrix includes  $n$  observa-  
310 tions and  $p$  features, and contains the missing data patterns we aim to capture using simulated data.  
311 To create generative models from these patterns, we characterize them using two steps of clustering.  
312 First, we group the  $p$  features into  $g$  clusters using a  $K$ -means algorithm. For instance, in methylation  
313 data, we use  $g = 100$ . This gives us a new matrix of size  $n \times g$ , showing the average missingness for  
314 each cluster of features. Next, we cluster this matrix by samples using hierarchical clustering with a  
315 cutree algorithm<sup>[36]</sup>, forming  $k$  sample clusters. In the case of methylation data, we set  $k = 10$ . This  
316 creates a total of  $g \times k$  unique clusters, each representing a different missing data pattern.

To apply the derived missing pattern cluster to a new dataset  $D'$ , we first assign each individual in  
 $D'$  to one of the  $k$  sample clusters based on the relative frequency of occurrence of the sample cluster  
in dataset  $D$ . Then, for each of the  $g$  feature clusters, we compute the probability of a data point from  
cluster  $(k, g)$  being missing as

$$P(m_{kg} = 1|x_{kg}) = \frac{P(x_{kg}|m_{kg} = 1) \times P(m_{kg} = 1)}{P(x_{kg})}$$

317 where  $P(m_{kg} = 1)$  is the probability of missing data in cluster  $(k, g)$ , estimated by the proportion of  
318 missingness in this cluster.  $P(x_{kg})$  is the probability density of values in cluster  $(k, g)$ , which can be  
319 approximated from the observed data.  $P(x_{kg}|m_{kg} = 1)$  is the probability density of missing values,  
320 approximated using features with higher missing rates within the cluster, defined as those having  
321 missing rates above the median for features with at least one missing value. To compute  $P(x_{kg})$   
322 and  $P(x_{kg}|m_{kg} = 1)$ , we consider the area under the curve (AUC) of the empirical density function,  
323 within one standard deviation around the mean values of these variables, i.e., AUC within the range  
324 of  $E(x_{kg}) \pm \sqrt{Var(x_{kg})}$  and  $E(x_{kg}|m_{kg} = 1) \pm \sqrt{Var(x_{kg}|m_{kg} = 1)}$ , respectively. This process is  
325 iteratively applied to each feature within every cluster, until a sample is simulated to accurately  
326 reflects the intended missing pattern for the features. Other samples in  $D'$  can be simulated similarly.

#### 327 4.2.2. Imputation efficacy metrics

328 In our analysis, we evaluated the effectiveness of various imputation methods using three key metrics:  
329 normalized root mean square error (NRMSE)<sup>[37]</sup>, normalized mean absolute error (NMAE)<sup>[38]</sup>, and the  
330 squared Pearson correlation coefficient ( $R^2$ ) that we computed at feature level. NRMSE, defined as the  
331 root mean square error normalized by the standard deviation of the observed value of the feature, is  
332 calculated as  $NRMSE = \frac{\sqrt{\sum_{i=1}^N (\hat{x}_i - x_i)^2}}{\sqrt{Var(x)}}$  where  $N$  is the number of observations with missing value,  $x$  is  
333 the observed values, and  $\hat{x}$  is the predicted values. NMAE, the mean absolute error normalized by the  
334 range of the observed value, is given by  $NMAE = \frac{\sum_{i=1}^N |\hat{x}_i - x_i|}{\max(x) - \min(x)}$ . The  $R^2$  metric measures the linear  
335 correlation between observed and predicted values, represented by the squared Pearson correlation,  
336 defined as  $R^2 = \left( \frac{\sum_{i=1}^N (\hat{x}_i - \bar{x})(x_i - \bar{x})}{\sqrt{\sum_{i=1}^N (\hat{x}_i - \bar{x})^2 \sum_{i=1}^N (x_i - \bar{x})^2}} \right)^2$ .

### 337 4.3. Numerical study on xQTL discovery

#### 338 4.3.1. Simulate genotype and molecular phenotype association

339 To accurately capture the molecular phenotype structure found in real multi-omics data, we devised  
340 a reverse simulation approach generating genotype of variants in cis-regulatory regions in linkage  
341 disequilibrium (LD) with each other, and their association with molecular features observed in multi-  
342 omics resources previously described. We considered five phenotype datasets, listed in “Data” of Figure  
343 1, to conduct the simulation study. Following basic processing procedures (elaborated in Figure 1), we  
344 select subsets of molecular features for proteomics and metabolomics data requiring that 1) features

345 have no missing entry for MCAR based simulation scenarios; 2) features with less than 5% missing  
346 rate in the MNAR scenario. For methylation data containing many CpG sites, we compute PCA of  
347 CpGs in each topologically associating domain (TAD)<sup>[39]</sup> and select up to 10 CpG most correlated to  
348 the first PC with  $R^2 > 0.75$ .

For each molecular feature (a gene, a metabolite or a CpG site), we considered the generative model  $y = Xb + Zc + \epsilon$ , where  $X$  is an  $N \times P$  genotype matrix for  $P$  variants,  $b$  is a  $P \times 1$  vector of the effect size on molecular genotype on  $y$ , and  $\epsilon \sim N(0, \sigma^2)$  is other random effects. After regressing out known and inferred covariates  $Z$  from  $y$ <sup>[40]</sup> we generate genotype by using this residual  $y_{res}$ <sup>[41]</sup>. Specifically,

$$X_{sim} = y_{res}\beta + T,$$

349 where  $T \sim MVN_p(0, \Sigma)$  is a multivariate normal distribution with mean 0 and covariance matrix  $\Sigma$   
350 being the LD matrix of genotype. For each molecular phenotype, we randomly drew  $M_{block} \in [5, 15]$  LD  
351 blocks and  $P_m \in [10, 50]$  variants in each LD block for  $m = 1, \dots, M_{block}$ . Note that  $\sum_{m=1}^{M_{block}} P_m = P$ .  
352 For  $m$ -th LD block, we used the following procedure to generate LD structure:

- 353 1. Generate a Barabasi-Albert network (BAN) to mimic LD among variants<sup>[42]</sup>. If two variants  
354 are connected in the BAN, these two variants are considered to be in LD; otherwise, these two  
355 variants are considered independent. The variants may be connected only if they are in the same  
356 LD block.
- 357 2. Let  $\Theta = (\theta_{pk})$  be an initial concentration matrix for  $p, k = 1, \dots, P_m$ . Here,  $\theta_{pk}$  is set as 0 if  
358 two variants ( $p, k$ ) are not connected in BAN;  $\theta_{pk}$  from a uniform distribution on the domain of  
359  $[-0.9, -0.1] \cup [0.1, 0.9]$  if two variants ( $p, k$ ) are connected in BAN.
- 360 3. Rescale the non-zero elements in  $\Theta$  to assure its positive definiteness, that is, we divide each  
361 off-diagonal element by  $\lambda$ -fold of the sum of the corresponding row, where  $\lambda > 1.5$  is the rescale  
362 rate. Then, the rescaled matrix is averaged by its transpose to ensure symmetry.
- 363 4. Denote  $W = (\omega_{pk})$  as the inverse of  $\Theta$  after rescaling and averaging. Elements  $\Sigma_{pk}$  in the  
364 covariance matrix  $\Sigma$  is determined by  $\Sigma_{pk} = \omega_{pk} \sqrt{\omega_{pp}\omega_{kk}}$ .

365 We randomly selected one to five linkage disequilibrium (LD) blocks from  $M_{block}$  to establish the  
366 cis-windows for xQTL analysis. Within each block, one variant is randomly chosen as the true causal  
367 variant, with a fixed effect size  $\beta = 1$ . The residual variance  $\sigma^2$  is used to adjust the proportion  
368 of variance explained (PVE) by genetic variants for a molecular phenotype. By definition, for a  
369 generative model  $y_{sim} = y_{res} + \epsilon$  where  $\epsilon \sim N(0, \sigma^2)$ ,  $PVE = \frac{Var(y_{res})}{Var(y_{res}) + \sigma^2}$ . In our reverse simulation  
370 model,  $y_{sim} = \frac{X_{sim} - T}{\beta} + \epsilon$ , leading to  $PVE = \frac{Var(y_{res})}{Var(y_{res}) + \sigma^2} = \frac{(Var(X_{sim}) + 1)/\beta^2}{(Var(X_{sim}) + 1)/\beta^2 + \sigma^2}$ . For proteomics and  
371 metabolomics in our simulation model, we assume a total PVE of 25% (per variant PVE is 5%), while  
372 for the methylation study, a 50% PVE<sup>[43,44]</sup> is assumed (per variant PVE is 10%). This approach  
373 allows us to simulate a realistic scenario reflecting the genetic contributions to molecular phenotypes  
374 in these studies.

375 We conducted multiple independent simulations to evaluate power and false discovery rate (FDR).  
376 Each molecular feature in the simulation is treated as an independent analysis unit. For the ROSMAP  
377 proteomics data, we considered 3,851 features across 3 replicates, which amounts to 11,553 association  
378 analysis units for assessing power and FDR. The Knight proteomics dataset, having a much fewer  
379 number of features 49, required 10 replicates to ensure a robust evaluation of power and FDR for  
380 this particular dataset with a total of 490 analysis units. The ROSMAP metabolomics dataset has  
381 369 features across 5 replicates, amounting to 1845 associations analysis units. We analyzed 1,381  
382 TADs for methylation data, with each TAD containing 10 CpG sites. This results in a total of 13,810  
383 association analysis units to robustly evaluate methylation QTL. We combine these molecular features  
384 into matrices  $Y = [y_1, y_2, \dots, y_R]$  and assign missing data to them based on MCAR model with 50%  
385 missing rate, to assess a moderate to high missing data scenario.

### 386 4.3.2. Statistical analysis for xQTL association

387 Statistical fine-mapping of the simulated genotype across the three molecular phenotype types was  
388 conducted on each replicate using SuSiE<sup>[23]</sup>. Fine-mapping serves to address multiple testing issues in  
389 cis-xQTL associations, and to differentiate causal variants from other variants in LD with them. The  
390 outputs of fine-mapping are posterior inclusion probabilities (PIPs) and credible sets each capturing a  
391 single causal variants. To evaluate these results, we generated precision-recall (PR) and ROC curves  
392 using the R package ROCR<sup>[45]</sup> at various PIP thresholds. Additionally, we assessed the coverage of  
393 credible sets to evaluate the false discovery rate for single effects fine-mapped. Further details on these  
394 evaluation methods are available in the SuSiE manuscript<sup>[23]</sup>.

## References

- [1] Gary J. Patti, Oscar Yanes, and Gary Siuzdak. Metabolomics: the apogee of the omics trilogy. *Nature Reviews Molecular Cell Biology*, 13(4):263–269, March 2012. ISSN 1471-0080. doi: 10.1038/nrm3314. URL <http://dx.doi.org/10.1038/nrm3314>.
- [2] Meng Song, Jonathan Greenbaum, Joseph Luttrell, Weihua Zhou, Chong Wu, Hui Shen, Ping Gong, Chaoyang Zhang, and Hong-Wen Deng. A review of integrative imputation for multi-omics datasets. *Frontiers in Genetics*, 11, October 2020. ISSN 1664-8021. doi: 10.3389/fgene.2020.570255. URL <http://dx.doi.org/10.3389/fgene.2020.570255>.
- [3] Trinh Nguyen, Xiaopeng Bian, David Roberson, Rakesh Khanna, Qingrong Chen, Chunhua Yan, Rowan Beck, Zelia Worman, and Daoud Meerzaman. Multi-omics pathways workflow (mopaw): An automated multi-omics workflow on the cancer genomics cloud. *Cancer Informatics*, 22, January 2023. ISSN 1176-9351. doi: 10.1177/11769351231180992. URL <http://dx.doi.org/10.1177/11769351231180992>.
- [4] Zhiguang Huo, Yun Zhu, Lei Yu, Jingyun Yang, Philip De Jager, David A. Bennett, and Jinying Zhao. Dna methylation variability in alzheimer’s disease. *Neurobiology of Aging*, 76:35–44, April 2019. ISSN 0197-4580. doi: 10.1016/j.neurobiolaging.2018.12.003. URL <http://dx.doi.org/10.1016/j.neurobiolaging.2018.12.003>.
- [5] Trevor Hastie, Rahul Mazumder, Jason D. Lee, and Reza Zadeh. Matrix completion and low-rank svd via fast alternating least squares. *J. Mach. Learn. Res.*, 16(1):3367–3402, jan 2015. ISSN 1532-4435.
- [6] Julie Josse and François Husson. missmda: A package for handling missing values in multivariate data analysis. *Journal of Statistical Software*, 70(1), 2016. ISSN 1548-7660. doi: 10.18637/jss.v070.i01. URL <http://dx.doi.org/10.18637/jss.v070.i01>.
- [7] R. Argelaguet, B. Velten, D. Arnol, S. Dietrich, T. Zenz, J. C. Marioni, F. Buettner, W. Huber, and O. Stegle. Multi-omics factor analysis—a framework for unsupervised integration of multi-omics data sets. *Mol Syst Biol*, 14(6):e8124, 2018.
- [8] Daniel J. Stekhoven and Peter Bühlmann. Missforest—non-parametric missing value imputation for mixed-type data. *Bioinformatics*, 28(1):112–118, 10 2011. ISSN 1367-4803. doi: 10.1093/bioinformatics/btr597. URL <https://doi.org/10.1093/bioinformatics/btr597>.
- [9] Akbar K Waljee, Ashin Mukherjee, Amit G Singal, Yiwei Zhang, Jeffrey Warren, Ulysses Balis, Jorge Marrero, Ji Zhu, and Peter DR Higgins. Comparison of imputation methods for missing laboratory data in medicine. *BMJ Open*, 3(8):e002847, August 2013. ISSN 2044-6055. doi: 10.1136/bmjopen-2013-002847. URL <http://dx.doi.org/10.1136/bmjopen-2013-002847>.
- [10] Simon Davis, Connor Scott, Janina Oetjen, Philip D. Charles, Benedikt M. Kessler, Olaf Ansorge, and Roman Fischer. Deep topographic proteomics of a human brain tumour. *Nature Communications*, 14(1), November 2023. ISSN 2041-1723. doi: 10.1038/s41467-023-43520-8. URL <http://dx.doi.org/10.1038/s41467-023-43520-8>.

- [11] Philip L. De Jager, Yiyi Ma, Cristin McCabe, Jishu Xu, Badri N. Vardarajan, Daniel Felsky, Hans-Ulrich Klein, Charles C. White, Mette A. Peters, Ben Lodgson, Parham Nejad, Anna Tang, Lara M. Mangravite, Lei Yu, Chris Gaiteri, Sara Mostafavi, Julie A. Schneider, and David A. Bennett. A multi-omic atlas of the human frontal cortex for aging and alzheimer's disease research. *Scientific Data*, 5(1), August 2018. ISSN 2052-4463. doi: 10.1038/sdata.2018.142. URL <http://dx.doi.org/10.1038/sdata.2018.142>.
- [12] Ben Omega Petrazzini, Hugo Naya, Fernando Lopez-Bello, Gustavo Vazquez, and Lucía Spangenberg. Evaluation of different approaches for missing data imputation on features associated to genomic data. *BioData Mining*, 14(1), September 2021. ISSN 1756-0381. doi: 10.1186/s13040-021-00274-7. URL <http://dx.doi.org/10.1186/s13040-021-00274-7>.
- [13] Dongdong Lin, Jigang Zhang, Jingyao Li, Chao Xu, Hong-Wen Deng, and Yu-Ping Wang. An integrative imputation method based on multi-omics datasets. *BMC Bioinformatics*, 17(1), June 2016. ISSN 1471-2105. doi: 10.1186/s12859-016-1122-6. URL <http://dx.doi.org/10.1186/s12859-016-1122-6>.
- [14] Tommi Välikangas, Tomi Suomi, and Laura L. Elo. A comprehensive evaluation of popular proteomics software workflows for label-free proteome quantification and imputation. *Briefings in Bioinformatics*, May 2017. ISSN 1477-4054. doi: 10.1093/bib/bbx054. URL <http://dx.doi.org/10.1093/bib/bbx054>.
- [15] Bernard Ng, Charles C White, Hans-Ulrich Klein, Solveig K Sieberts, Cristin McCabe, Ellis Patrick, Jishu Xu, Lei Yu, Chris Gaiteri, David A Bennett, Sara Mostafavi, and Philip L De Jager. An xqtl map integrates the genetic architecture of the human brain's transcriptome and epigenome. *Nature Neuroscience*, 20(10):1418–1426, September 2017. ISSN 1546-1726. doi: 10.1038/nn.4632. URL <http://dx.doi.org/10.1038/nn.4632>.
- [16] Chengran Yang, Fabiana H. G. Farias, Laura Ibanez, Adam Suhy, Brooke Sadler, Maria Victoria Fernandez, Fengxian Wang, Joseph L. Bradley, Brett Eiffert, Jorge A. Bahena, John P. Budde, Zeran Li, Umber Dube, Yun Ju Sung, Kathie A. Mihindukulasuriya, John C. Morris, Anne M. Fagan, Richard J. Perrin, Bruno A. Benitez, Herve Rhinn, Oscar Harari, and Carlos Cruchaga. Genomic atlas of the proteome from brain, csf and plasma prioritizes proteins implicated in neurological disorders. *Nature Neuroscience*, 24(9):1302–1312, July 2021. ISSN 1546-1726. doi: 10.1038/s41593-021-00886-6. URL <http://dx.doi.org/10.1038/s41593-021-00886-6>.
- [17] Yun Ju Sung, Chengran Yang, Joanne Norton, Matt Johnson, Anne Fagan, Randall J. Bateman, Richard J. Perrin, John C. Morris, Martin R. Farlow, Jasmeer P. Chhatwal, Peter R. Schofield, Helena Chui, Fengxian Wang, Brenna Novotny, Abdallah Eteleeb, Celeste Karch, Suzanne E. Schindler, Herve Rhinn, Erik C. B. Johnson, Hamilton Se-Hwee Oh, Jarod Evert Rutledge, Eric B. Dammer, Nicholas T. Seyfried, Tony Wyss-Coray, Oscar Harari, and Carlos Cruchaga. Proteomics of brain, csf, and plasma identifies molecular signatures for distinguishing sporadic and genetic alzheimer's disease. *Science Translational Medicine*, 15(703), July 2023. ISSN 1946-6242. doi: 10.1126/scitranslmed.abq5923. URL <http://dx.doi.org/10.1126/scitranslmed.abq5923>.
- [18] Wei Wang and Matthew Stephens. Empirical bayes matrix factorization, 2018. URL <https://arxiv.org/abs/1802.06931>.
- [19] Donald B. Rubin. *Multiple Imputation for Nonresponse in Surveys*. Wiley, June 1987. ISBN 9780470316696. doi: 10.1002/9780470316696. URL <http://dx.doi.org/10.1002/9780470316696>.
- [20] Sik-Yum Lee. Handbook of latent variable and related models. 2007. URL <https://api.semanticscholar.org/CorpusID:119011975>.
- [21] Huimin Wang, Jianxiang Tang, Mengyao Wu, Xiaoyu Wang, and Tao Zhang. Application of machine learning missing data imputation techniques in clinical decision making: taking the discharge assessment of patients with spontaneous supratentorial intracerebral hemorrhage as an



- example. *BMC Medical Informatics and Decision Making*, 22(1), January 2022. ISSN 1472-6947. doi: 10.1186/s12911-022-01752-6. URL <http://dx.doi.org/10.1186/s12911-022-01752-6>.
- [22] Tianqi Chen and Carlos Guestrin. XGBoost: A scalable tree boosting system. In *Proceedings of the 22nd ACM SIGKDD International Conference on Knowledge Discovery and Data Mining*, KDD '16, pages 785–794, New York, NY, USA, 2016. ACM. ISBN 978-1-4503-4232-2. doi: 10.1145/2939672.2939785. URL <http://doi.acm.org/10.1145/2939672.2939785>.
- [23] Gao Wang, Abhishek Sarkar, Peter Carbonetto, and Matthew Stephens. A simple new approach to variable selection in regression, with application to genetic fine mapping. *Journal of the Royal Statistical Society Series B: Statistical Methodology*, 82(5):1273–1300, July 2020. ISSN 1467-9868. doi: 10.1111/rssb.12388. URL <http://dx.doi.org/10.1111/rssb.12388>.
- [24] Halit Ongen, Alfonso Buil, Andrew Anand Brown, Emmanouil T. Dermitzakis, and Olivier Delaneau. Fast and efficient qtl mapper for thousands of molecular phenotypes. *Bioinformatics*, 32(10):1479–1485, December 2015. ISSN 1367-4803. doi: 10.1093/bioinformatics/btv722. URL <http://dx.doi.org/10.1093/bioinformatics/btv722>.
- [25] Amaro Taylor-Weiner, François Aguet, Nicholas J. Haradhvala, Sager Gosai, Shankara Anand, Jaegil Kim, Kristin Ardlie, Eliezer M. Van Allen, and Gad Getz. Scaling computational genomics to millions of individuals with gpus. *Genome Biology*, 20(1), November 2019. ISSN 1474-760X. doi: 10.1186/s13059-019-1836-7. URL <http://dx.doi.org/10.1186/s13059-019-1836-7>.
- [26] John D. Storey and Robert Tibshirani. Statistical significance for genomewide studies. *Proceedings of the National Academy of Sciences*, 100(16):9440–9445, July 2003. ISSN 1091-6490. doi: 10.1073/pnas.1530509100. URL <http://dx.doi.org/10.1073/pnas.1530509100>.
- [27] Pietro Di Lena, Claudia Sala, Andrea Prodi, and Christine Nardini. Methylation data imputation performances under different representations and missingness patterns. *BMC Bioinformatics*, 21(1), June 2020. ISSN 1471-2105. doi: 10.1186/s12859-020-03592-5. URL <http://dx.doi.org/10.1186/s12859-020-03592-5>.
- [28] Wenpin Hou, Zhicheng Ji, Hongkai Ji, and Stephanie C. Hicks. A systematic evaluation of single-cell rna-sequencing imputation methods. *Genome Biology*, 21(1), August 2020. ISSN 1474-760X. doi: 10.1186/s13059-020-02132-x. URL <http://dx.doi.org/10.1186/s13059-020-02132-x>.
- [29] *Epigenome-Wide Association Studies: Methods and Protocols*. Springer US, 2022. ISBN 9781071619940. doi: 10.1007/978-1-0716-1994-0. URL <http://dx.doi.org/10.1007/978-1-0716-1994-0>.
- [30] Lei Huang, Meng Song, Hui Shen, Huixiao Hong, Ping Gong, Hong-Wen Deng, and Chaoyang Zhang. Deep learning methods for omics data imputation. *Biology*, 12(10):1313, October 2023. ISSN 2079-7737. doi: 10.3390/biology12101313. URL <http://dx.doi.org/10.3390/biology12101313>.
- [31] Mingon Kang, Euseong Ko, and Tesfaye B Mersha. A roadmap for multi-omics data integration using deep learning. *Briefings in Bioinformatics*, 23(1), November 2021. ISSN 1477-4054. doi: 10.1093/bib/bbab454. URL <http://dx.doi.org/10.1093/bib/bbab454>.
- [32] Diederik P Kingma and Max Welling. Auto-encoding variational bayes, 2013. URL <https://arxiv.org/abs/1312.6114>.
- [33] Sebastian Jäger, Arndt Allhorn, and Felix Bießmann. A benchmark for data imputation methods. 4. ISSN 2624-909X. URL <https://www.frontiersin.org/articles/10.3389/fdata.2021.693674>.
- [34] Rianne Margaretha Schouten, Peter Lugtig, and Gerko Vink. Generating missing values for simulation purposes: a multivariate amputation procedure. 88(15):2909–2930. ISSN 0094-9655. doi: 10.1080/00949655.2018.1491577. URL <https://doi.org/10.1080/00949655.2018.1491577>. Publisher: Taylor & Francis .eprint: <https://doi.org/10.1080/00949655.2018.1491577>.

- [35] Dimitris Bertsimas, Colin Pawlowski, and Ying Daisy Zhuo. From predictive methods to missing data imputation: an optimization approach. 18(1):7133–7171. ISSN 1532-4435.
- [36] R. Becker. *The New S Language*. CRC Press. ISBN 978-1-351-09188-6. Google-Books-ID: 30paDwAAQBAJ.
- [37] S.A. Otto. How to normalize the RMSE. URL <https://www.marinedatascience.co/blog/2019/01/07/normalizing-the-rmse/>.
- [38] Thi-Thu-Hong Phan, Émilie Poisson Caillaud, Alain Lefebvre, and André Bigand. Dynamic time warping-based imputation for univariate time series data. 139:139–147. ISSN 0167-8655. doi: 10.1016/j.patrec.2017.08.019. URL <https://www.sciencedirect.com/science/article/pii/S0167865517302751>.
- [39] Sudha Rajderkar, Iros Barozzi, Yiwen Zhu, Rong Hu, Yanxiao Zhang, Bin Li, Ana Alcaina Caro, Yoko Fukuda-Yuzawa, Guy Kelman, Adyam Akeza, Matthew J. Blow, Quan Pham, Anne N. Harrington, Janeth Godoy, Eman M. Meky, Kianna von Maydell, Riana D. Hunter, Jennifer A. Akiyama, Catherine S. Novak, Ingrid Plajzer-Frick, Veena Afzal, Stella Tran, Javier Lopez-Rios, Michael E. Talkowski, K. C. Kent Lloyd, Bing Ren, Diane E. Dickel, Axel Visel, and Len A. Pennacchio. Topologically associating domain boundaries are required for normal genome function. *Communications Biology*, 6(1), April 2023. ISSN 2399-3642. doi: 10.1038/s42003-023-04819-w. URL <http://dx.doi.org/10.1038/s42003-023-04819-w>.
- [40] Hidden factor analysis. [https://cumc.github.io/xqtl-pipeline/code/data\\_preprocessing/covariate/covariate\\_hidden\\_factor.html](https://cumc.github.io/xqtl-pipeline/code/data_preprocessing/covariate/covariate_hidden_factor.html).
- [41] Xuewei Cao, Ling Zhang, Md Khairul Islam, Mingxia Zhao, Cheng He, Kui Zhang, Sanzhen Liu, Qiying Sha, and Hairong Wei. Tgpred: efficient methods for predicting target genes of a transcription factor by integrating statistics, machine learning and optimization. *NAR genomics and bioinformatics*, 5(3):lqad083, 2023.
- [42] Réka Albert and Albert-László Barabási. Statistical mechanics of complex networks. *Reviews of modern physics*, 74(1):47, 2002.
- [43] Margaret Gatz, Chandra A. Reynolds, Laura Fratiglioni, Boo Johansson, James A. Mortimer, Stig Berg, Amy Fiske, and Nancy L. Pedersen. Role of genes and environments for explaining alzheimer disease. *Archives of General Psychiatry*, 63(2):168, February 2006. ISSN 0003-990X. doi: 10.1001/archpsyc.63.2.168. URL <http://dx.doi.org/10.1001/archpsyc.63.2.168>.
- [44] Rebecca Sims, Matthew Hill, and Julie Williams. The multiplex model of the genetics of alzheimer’s disease. *Nature Neuroscience*, 23(3):311–322, February 2020. ISSN 1546-1726. doi: 10.1038/s41593-020-0599-5. URL <http://dx.doi.org/10.1038/s41593-020-0599-5>.
- [45] T. Sing, O. Sander, N. Beerenwinkel, and T. Lengauer. Rocr: visualizing classifier performance in r. *Bioinformatics*, 21(20):3940–3941, August 2005. ISSN 1460-2059. doi: 10.1093/bioinformatics/bti623. URL <http://dx.doi.org/10.1093/bioinformatics/bti623>.

395 **Supplementary Figures**

396 We validate our realistic missing generation approach on real data. The following is the heatmap of  
397 the observed and generated missing patterns on the data.

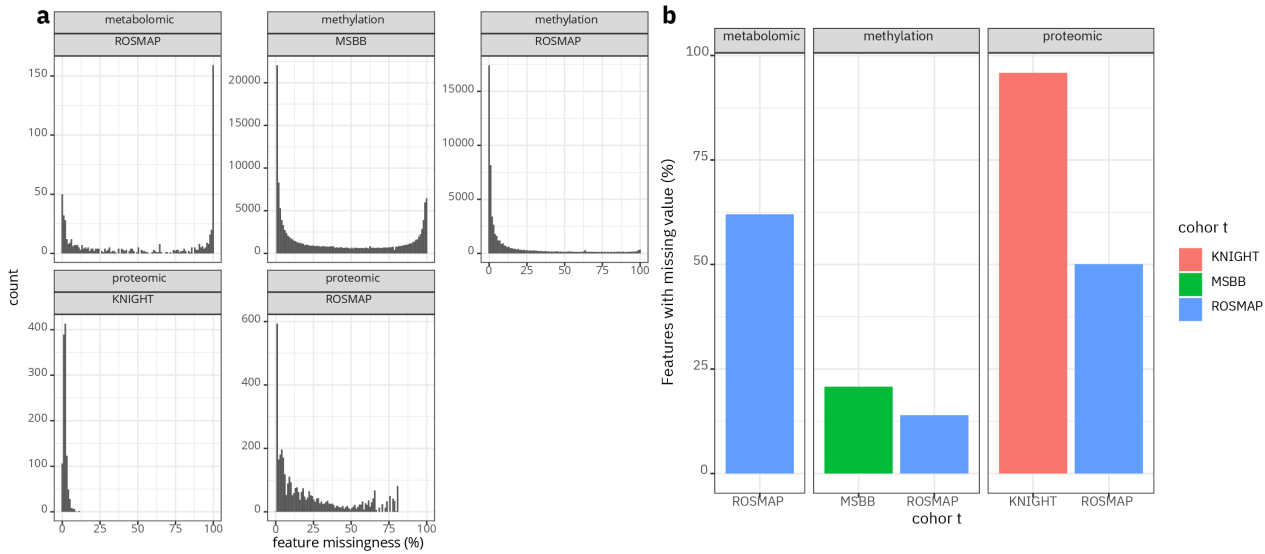

**Fig. S1. missing rate distribution.** Panel a-b summarize the missing rate distribution for datasets. Panel a is the summary of distribution of missing rate for features across datasets. Panel b summarize the proportion of features that have at least one missing entry across datasets.

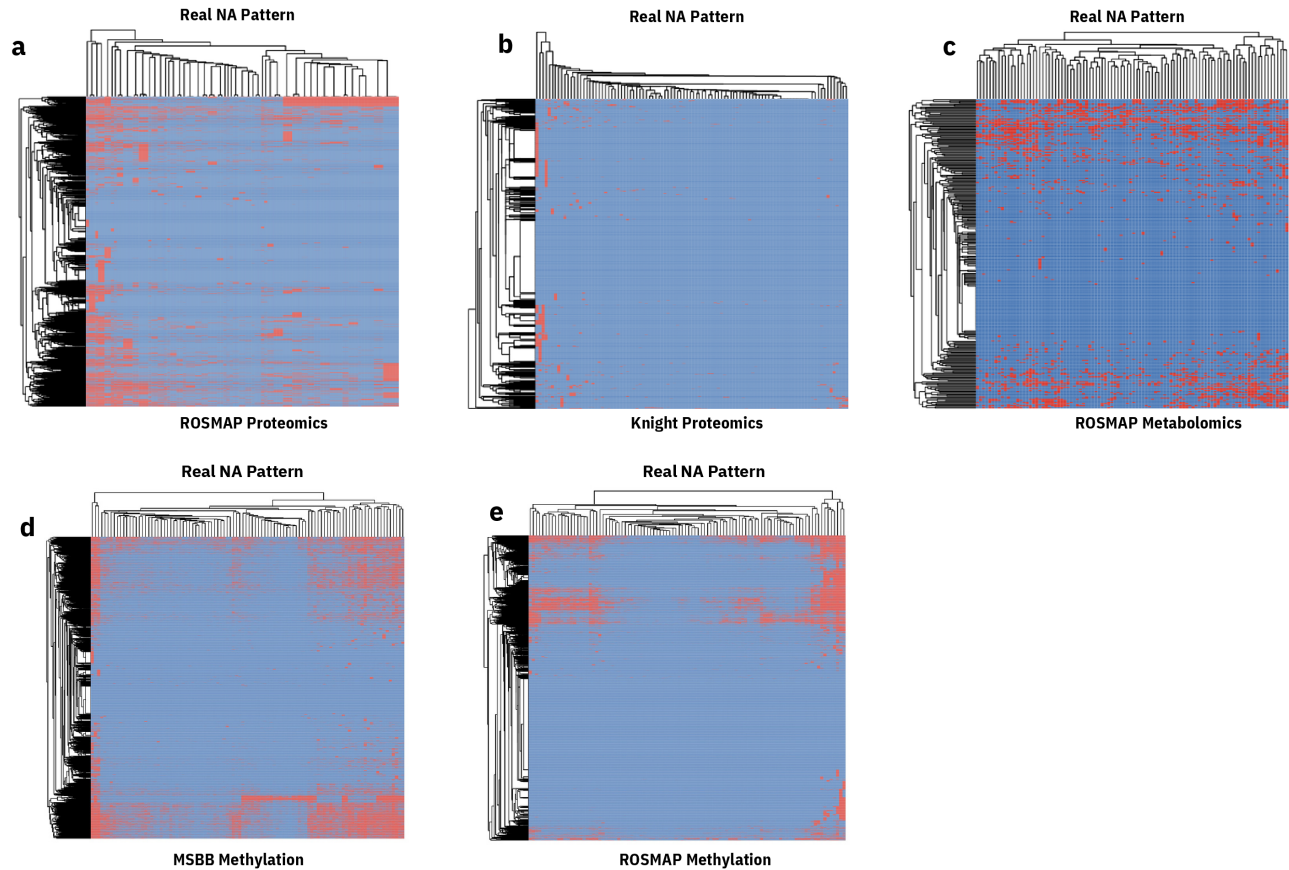

**Fig. S2. Real Missing Pattern.** The heatmap summarize the observed missing for each datasets. Panel a is the observed missing pattern for ROSMAP proteomics, panel b for Knight proteomics. Panel c summarize the missing pattern for ROSMAP metabolomics. And panel d-e are missing pattern for MSBB and ROSMAP methylation.

398 **Supplementary Tables**

399 **Supplementary Table S1:** Multi-omics Application Literature Involving Imputation Methods

400 **Supplementary Table S2:** Methodology and Benchmarking Literature for Imputation Methods

401 **Supplementary Table S3:** List of Imputation Methods Evaluated

402 **Supplementary Table S4:** Sensitivity of Tuning Parameter Settings in Imputation Methods
